# Supplementary material
Source: PubMed Central journal article supplement (PMC3138637)
Supplement: supp_jn.111.138966_nut_138966_F1.pdf [file supp_jn.111.138966_nut_138966_F1.pdf]

## Online Supplemental Material

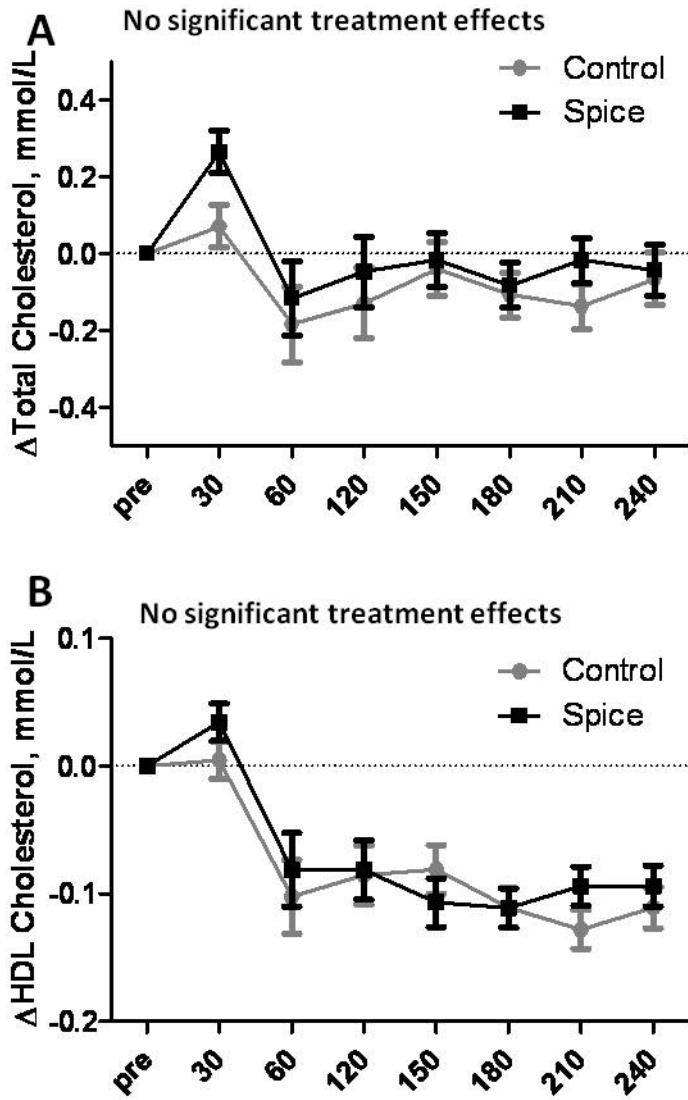

**Supplemental Figure 1.** Changes in serum concentrations of total cholesterol (A) and HDL cholesterol (B) after consumption of test meals. Means are reported as least-squares means  $\pm$  SEM,  $n = 6$ . Change scores were calculated by subtracting pre-meal baseline values from each time point. There were no significant effects of treatment by time point or treatment as a main effect.
