# Supplementary material
Source: PubMed Central journal article supplement (PMC3138637)
Supplement: supp_jn.111.138966_nut_138966_T1.pdf [file supp_jn.111.138966_nut_138966_T1.pdf]

## Online Supplemental Material

### Supplemental Table 1: Study Diet Restrictions

1) You will be asked to refrain from taking any vitamins or protein supplements once you are enrolled in the study and you will refrain from taking any of these products for the entire time you are involved in the study.

2) For two days before each test day, you will be asked to follow a very low fruit, vegetable, and spice content diet (see restricted food list below). On each of the two the days, you will keep a record of what you eat on the forms given to you and you will return those forms to the GCRC dietitian as instructed.

### Antioxidant Rich Foods

|                                                                                                                                                                                                                                                                                                                                                                                                                                                                                      |                                                                                                                                                                                                                                                                                                                                                                                                                                                                               |                                                                                                                                                                                                                                                                                                                                                                                                                                                                |
|--------------------------------------------------------------------------------------------------------------------------------------------------------------------------------------------------------------------------------------------------------------------------------------------------------------------------------------------------------------------------------------------------------------------------------------------------------------------------------------|-------------------------------------------------------------------------------------------------------------------------------------------------------------------------------------------------------------------------------------------------------------------------------------------------------------------------------------------------------------------------------------------------------------------------------------------------------------------------------|----------------------------------------------------------------------------------------------------------------------------------------------------------------------------------------------------------------------------------------------------------------------------------------------------------------------------------------------------------------------------------------------------------------------------------------------------------------|
| <p><b><u>Drinks</u></b><br/>Alcoholic beverages<br/>Coffee, tea, hot cocoa<br/>Fruit juices<br/>Chocolate Milk</p> <p><b><u>Fruits</u></b><br/>Apples<br/>Apricots<br/>Avocado<br/>Bananas<br/>Berries (Blackberries, Blueberries, Cranberries, Raspberries, Strawberries)<br/>Cherries<br/>Dates<br/>Figs<br/>Kiwi<br/>Red, purple, black grapes<br/>Prunes<br/>Citrus fruits (grapefruit, orange)<br/>Mango<br/>Prunes<br/>Peaches (raw)<br/>Pears (raw)<br/>Plums<br/>Raisins</p> | <p><b><u>Vegetables/Legumes</u></b><br/>Artichokes<br/>Asparagus<br/>Beans (small red, pinto, kidney, black)<br/>Beets<br/>Bell peppers (red, green, yellow, orange)<br/>Broccoli<br/>Cabbage<br/>Eggplant (raw)<br/>Green leafy vegetables (romaine, spinach, kale, collard greens)<br/>Onions<br/>Russet or red potato<br/>Sweet potatoes<br/>Tomatoes-all fresh and processed products (tomato sauce or paste, tomato juice, spaghetti sauce, pizza sauce, salsa etc.)</p> | <p><b><u>Nuts/Seeds</u></b><br/>Nuts (such as peanuts, pecans, walnuts, hazelnuts)<br/>Peanut butter or other nut butters<br/>Seeds (such as sunflower, pumpkin)<br/>Wheat germ</p> <p><b><u>All Spices (Examples)</u></b><br/>Cinnamon<br/>Oregano<br/>Ground cloves<br/>Garlic<br/>Black Pepper<br/>Basil</p> <p><b><u>Other</u></b><br/>Chocolate<br/>Soybeans, soynuts, soy flour, soy milk<br/>Pies/desserts made with any listed fruits or chocolate</p> |
|--------------------------------------------------------------------------------------------------------------------------------------------------------------------------------------------------------------------------------------------------------------------------------------------------------------------------------------------------------------------------------------------------------------------------------------------------------------------------------------|-------------------------------------------------------------------------------------------------------------------------------------------------------------------------------------------------------------------------------------------------------------------------------------------------------------------------------------------------------------------------------------------------------------------------------------------------------------------------------|----------------------------------------------------------------------------------------------------------------------------------------------------------------------------------------------------------------------------------------------------------------------------------------------------------------------------------------------------------------------------------------------------------------------------------------------------------------|

## Online Supplemental Material

### Some ideas for meal planning using allowed foods low in antioxidants

Remember: one cup (or less) of coffee OR tea per day!

#### **Breakfast**

Pancakes or waffles with maple syrup  
Toast, bagels, muffins (not whole grain)  
with margarine  
Eggs

#### **Lunch**

Cream or broth soup (avoid listed veggies)  
Meat or cheese sandwich  
Salad with iceberg lettuce and cucumbers  
Canned peaches or pears  
Milk

#### **Dinner**

Meat prepared as you like it  
Pasta or rice (not whole grain or brown)  
Canned corn or green beans (1 serving)  
Roll with butter/margarine  
Can of soda, diet or regular

#### **Snacks, etc.**

Plain yogurt or cheese  
Pretzels, chips, cookies  
Celery and baby carrots (1 serving) with  
ranch dressing
